# Supplementary material
Source: publisher figshare collection journal article supplement (https://gsajournals.figshare.com/ndownloader/files/22851392)
Supplement: Supplementary file 1 [file 22851392]

**Figure S6. Between population FST calculated for 10,000 permuted sets of scaffolds encompassing an area similar in size to the odd haplotype. Results in each population pair calculated for scaffolds contS3saining the odd haplotype are shown in red color.**
